# Supplementary material for: Anti-tumor effects of everolimus and metformin are complementary and glucose-dependent in breast cancer cells
Source: PubMed Central journal article supplement (PMC5372253; doi:10.1186/s12885-017-3230-8), 2017-03-29

**11mM glucose**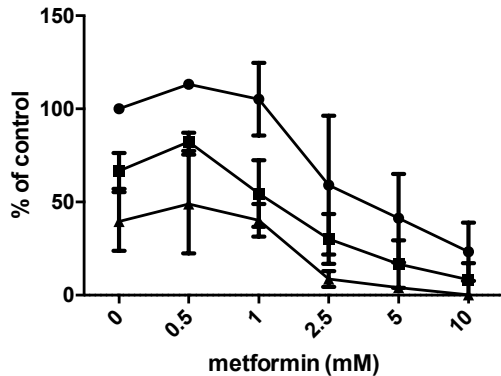**2.75mM glucose**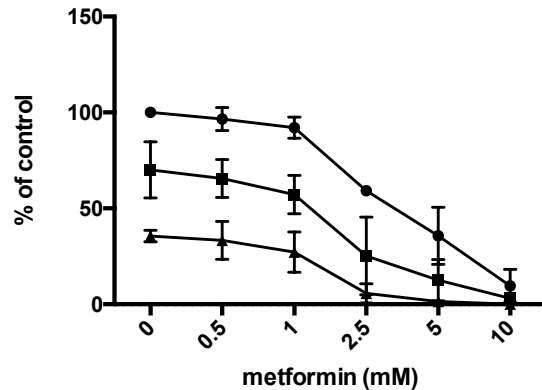**2.75mM glucose replenished**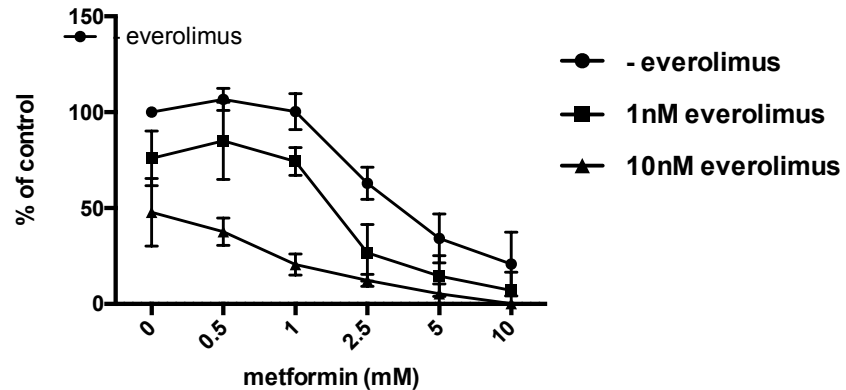

Supplement: 12885_2017_3230_MOESM3_ESM.pdf [file 12885_2017_3230_MOESM3_ESM.pdf]
