# Supplementary material for: Anti-tumor effects of everolimus and metformin are complementary and glucose-dependent in breast cancer cells
Source: Springer Nature journal article supplement (doi:10.1186/s12885-017-3230-8), 2017-03-29
Supplement: MOESM1 [file 12186902]

**MCF-7 11mM glucose**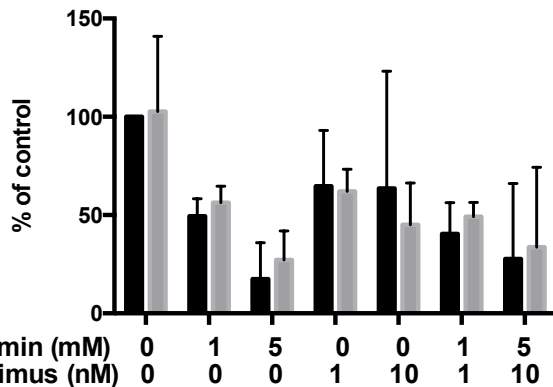**MCF-7 2.75mM glucose**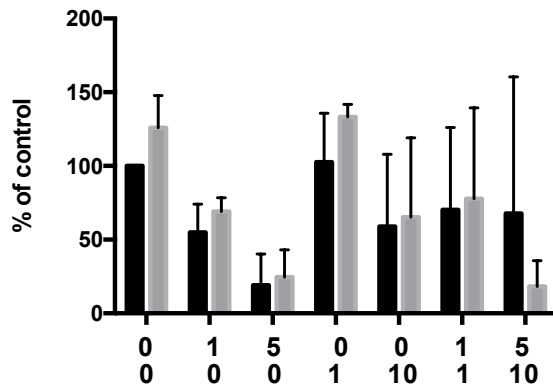**MDA-MB-231 11mM glucose**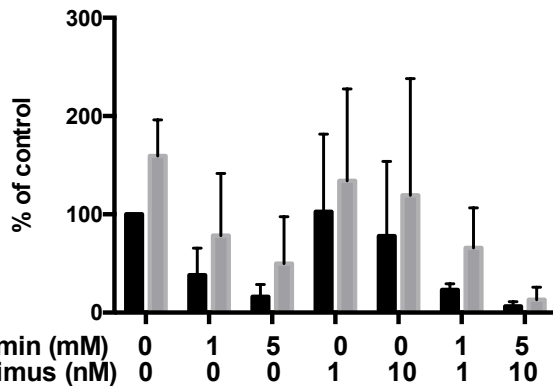**MDA-MB-231 2.75mM glucose**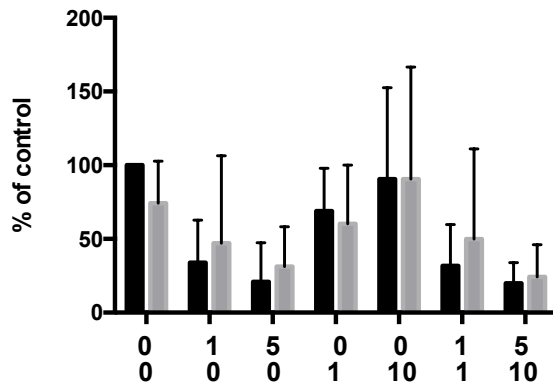

basal OCR

maximal OCR
